# Supplementary material for: Hippocampal Function Is Impaired by a Short-Term High-Fat Diet in Mice: Increased Blood–Brain Barrier Permeability and Neuroinflammation as Triggering Events
Source: PubMed Central journal article supplement (PMC8600238; doi:10.3389/fnins.2021.734158), 2021-11-04
Supplement: Image_1.pdf [file Image_1.pdf]

## Supplementary Material

### 1 Supplementary Figures

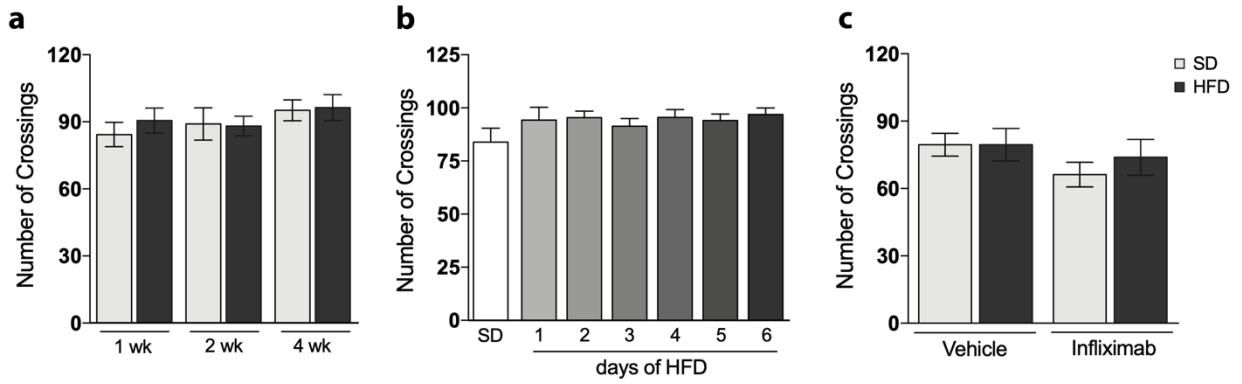

Values are mean  $\pm$  SEM.

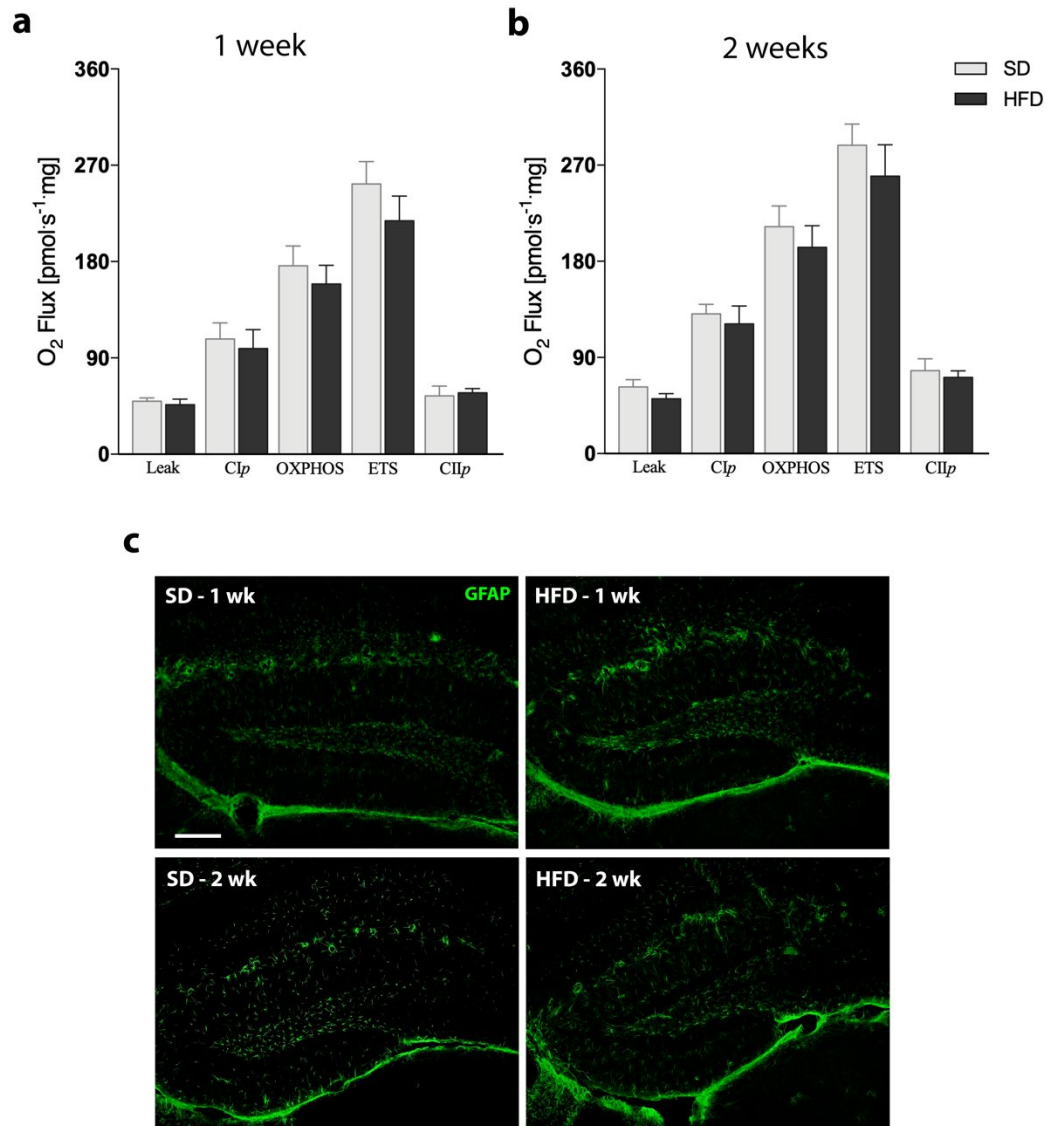

**Supplementary Figure 2. Mitochondrial function and astrocyte activation within 1 and 2 weeks of HFD.** **a-b)** Respirometric measurements by oxygen flux in the hippocampus of mice submitted to 1 (a) and 2 (b) weeks of SD or HFD (n= 5-6). **c)** Representative images of GFAP immunolabeling in the hippocampus of 1 and 2 weeks SD and HFD-treated mice (n= 4). Scale bar = 150  $\mu$ m. Values are mean  $\pm$  SEM.
